# Supplementary material for: Expression Analysis of Zinc Transporters in Nervous Tissue Cells Reveals Neuronal and Synaptic Localization of ZIP4
Source: MDPI journal article supplement (doi:10.3390/ijms22094511), 2021-04-26
Supplement: s1 [file s1]

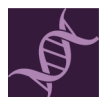

## Expression Analysis of Zinc Transporters in Nervous Tissue Cells Reveals Neuronal and Synaptic Localization of ZIP4

Chiara A. De Benedictis, Claudia Haffke, Simone Hagemeyer, Ann Katrin Sauer, Andreas M. Grabrucker

**Supplementary table S1:** **A)** In rat lysate from rat hippocampi, we found the expression of ZnT transporters relevant from the statistical analysis (one-way ANOVA:  $p=0.0049$ ). Post-hoc tests (Tukey's multiple comparisons test), underlined the following results:  $ZnT1$  vs.  $ZnT2$  ( $p=0.0218$ ),  $ZnT2$  vs.  $ZnT4$  ( $p=0.0188$ ),  $ZnT2$  vs.  $ZnT7$  ( $p=0.0468$ ),  $ZnT2$  vs.  $ZnT9$  ( $p=0.0061$ ). The Zip transporters expressed in the lysate of hippocampal lysates were not statistically significant (one-way ANOVA:  $p=0.0576$ ). **B)** In C6 Glioblastoma cell line, on mRNA level, we detected the expression of the following ZnTs, with significant differences among means after ANOVA and post-hoc tests:  $ZnT1$  vs.  $ZnT9$  ( $p<0.0001$ ),  $ZnT4$  vs.  $ZnT9$  ( $p<0.0001$ ),  $ZnT5$  vs.  $ZnT9$  ( $p<0.0001$ ),  $ZnT6$  vs.  $ZnT9$  ( $p<0.0001$ ),  $ZnT7$  vs.  $ZnT9$  ( $p<0.0001$ ). The Zips significantly expressed in C6 Glioblastoma were:  $Zip1$  vs.  $Zip9$  ( $p<0.0001$ ),  $Zip1$  vs.  $Zip10$  ( $p=0.0183$ ),  $Zip1$  vs.  $Zip13$  ( $p<0.0001$ ),  $Zip6$  vs.  $Zip9$  ( $p<0.0001$ ),  $Zip6$  vs.  $Zip13$  ( $p=0.0305$ ),  $Zip9$  vs.  $Zip10$  ( $p=0.0006$ ). In the DI TNC1 Astrocytes cell line we found the expression of the following ZnTs statistically significant different (ANOVA:  $p<0.0001$ , Tukey's multiple comparisons test):  $ZnT1$  vs.  $ZnT7$  ( $p<0.0001$ ),  $ZnT1$  vs.  $ZnT9$  ( $p<0.0001$ ),  $ZnT4$  vs.  $ZnT6$  ( $p=0.0047$ ),  $ZnT4$  vs.  $ZnT7$  ( $p=0.0133$ ),  $ZnT4$  vs.  $ZnT9$  ( $p<0.0001$ ),  $ZnT5$  vs.  $ZnT7$  ( $p=0.0001$ ),  $ZnT5$  vs.  $ZnT9$  ( $p<0.0001$ ),  $ZnT6$  vs.  $ZnT7$  ( $p<0.0001$ ),  $ZnT6$  vs.  $ZnT9$  ( $p<0.0001$ ),  $ZnT7$  vs.  $ZnT9$  ( $p<0.0001$ ). The following levels of expression of several Zip transporters were significantly different (Tukey's multiple comparisons test):  $Zip1$  vs.  $Zip8$  ( $p<0.0001$ ),  $Zip1$  vs.  $Zip9$  ( $p<0.0001$ ),  $Zip1$  vs.  $Zip10$  ( $p<0.0001$ ),  $Zip1$  vs.  $Zip11$  ( $p<0.0001$ ),  $Zip1$  vs.  $Zip13$  ( $p<0.0001$ ),  $Zip6$  vs.  $Zip8$  ( $p<0.0001$ ),  $Zip6$  vs.  $Zip9$  ( $p<0.0001$ ),  $Zip6$  vs.  $Zip10$  ( $p=0.0048$ ),  $Zip6$  vs.  $Zip11$  ( $p<0.0001$ ),  $Zip6$  vs.  $Zip13$  ( $p=0.0019$ ),  $Zip8$  vs.  $Zip11$  ( $p=0.0134$ ),  $Zip10$  vs.  $Zip11$  ( $p<0.0001$ ),  $Zip11$  vs.  $Zip13$  ( $p<0.0001$ ). **C)** In primary hippocampal neurons, ANOVA and post-hoc Tukey's multiple comparisons revealed significant differences:  $ZnT1$  vs.  $ZnT7$  ( $p<0.0001$ ),  $ZnT1$  vs.  $ZnT10$  ( $p=0.0083$ ),  $ZnT2$  vs.  $ZnT7$  ( $p<0.0001$ ),  $ZnT3$  vs.  $ZnT7$  ( $p<0.0001$ ),  $ZnT3$  vs.  $ZnT10$  ( $p=0.0051$ ),  $ZnT4$  vs.  $ZnT7$  ( $p<0.0001$ ),  $ZnT4$  vs.  $ZnT10$  ( $p=0.0051$ ),  $ZnT5$  vs.  $ZnT7$  ( $p<0.0001$ ),  $ZnT5$  vs.  $ZnT10$  ( $p<0.0055$ ),  $ZnT6$  vs.  $ZnT7$  ( $p<0.0001$ ),  $ZnT7$  vs.  $ZnT8$  ( $p<0.0001$ ),  $ZnT7$  vs.  $ZnT10$  ( $p=0.0005$ ),  $ZnT8$  vs.  $ZnT10$  ( $p=0.0050$ ). Regarding the Zip solute carrier family, we detected the following significant differences:  $Zip1$  vs.  $Zip2$  ( $p=0.0076$ ),  $Zip1$  vs.  $Zip4$  ( $p=0.0035$ ),  $Zip2$  vs.  $Zip4$  ( $p<0.0001$ ).
